# Supplementary material for: Annexin A5 stimulates autophagy and inhibits endocytosis
Source: Oxford University Press journal article supplement (doi:10.1242/jcs.086728), 2012-01-01
Supplement: jcs086728tables1.pdf [file jcs086728tables1.pdf]

**Table S1. Lysosomal pH under annexin A5 overexpression and silencing**

|     |                    | Overexpression |                    | Silencing |
|-----|--------------------|----------------|--------------------|-----------|
| KH  | C-                 | 5.52±0.02      | C-                 | 5.66±0.08 |
|     | A5                 | 5.58±0.10      | siA5               | 5.64±0.02 |
|     | NH <sub>4</sub> Cl | 6.64±0.05      | NH <sub>4</sub> Cl | 6.40±0.03 |
| IAA | C-                 | 5.23±0.07      | C-                 | 5.39±0.07 |
|     | A5                 | 5.27±0.04      | siA5               | 5.42±0.05 |
|     | NH <sub>4</sub> Cl | 6.38±0.11      | NH <sub>4</sub> Cl | 6.49±0.14 |

HEK293T cells were transfected with C- or A5 vectors (for overexpression) or C- and siA5 (for silencing). After 48 or 72 h, respectively, lysosomal pH was measured in cells incubated in KH or IAA media for 4 h as described in Materials and Methods. NH<sub>4</sub>Cl (20 mM) was used as positive control and pH values are shown as mean and s.d. from three different experiments. Differences were found not to be statistically significant.
